# Supplementary material for: Alteration in Serum Levels of Tumor Necrosis Factor Alpha is associated with Histopathologic Progression of Gastric Cancer
Source: PubMed Central journal article supplement (PMC9971713; doi:10.52547/ibj.3847), 2022-12-21
Supplement: ibj-27-72-s1.pdf [file ibj-27-72-s1.pdf]

**Supplementary Table 1.** Literature review of reports on serum TNF- $\alpha$  in GC patients

| Ref, year<br>country            | Cases<br>(n)                 | Control<br>(n) | GC vs.<br>control | Case<br>mean level (pg/ml)                               | Control mean<br>level (pg/ml) | Conclusion                                                                                            |
|---------------------------------|------------------------------|----------------|-------------------|----------------------------------------------------------|-------------------------------|-------------------------------------------------------------------------------------------------------|
| <sup>[1]</sup> 2007<br>Portugal | GC = 48                      | -              | -                 | MN = 28 $\pm$ 7<br>WN = 5 $\pm$ 3                        | -                             | Malnourished patients had higher values of TNF- $\alpha$ .                                            |
| <sup>[2]</sup> 2020<br>Morocco  | CG = 65<br>PL= 50<br>GC = 40 | H = 63         | GC > H            | CG = 51 $\pm$ 20<br>PL= 55 $\pm$ 28<br>GC = 117 $\pm$ 92 | 36 $\pm$ 16                   | TNF- $\alpha$ serum levels increased in accordance with gastric lesions severity.                     |
| <sup>[3]</sup> 2019<br>Turkey   | PL = 35<br>GC = 32           | H = 23         | GC > H            | PL= 38 $\pm$ 12<br>GC = 47 $\pm$ 15                      | 34 $\pm$ 13                   | There were significant differences among patients with GC, PCL, and H in terms of TNF- $\alpha$ .     |
| <sup>[4]</sup> 2018<br>China    | LG = 40<br>AOSG = 40         | -              | -                 | LG = 170 $\pm$ 51<br>AOSG = 185 $\pm$ 45                 | -                             | No significant differences between the LG and the AOSG                                                |
| <sup>[5]</sup> 2015<br>Turkey   | GC = 58                      | H = 20         | GC > H            | Median = 13 (5-58)                                       | 10 (6-31)                     | Serum level of TNF- $\alpha$ may be a diagnostic marker.                                              |
| <sup>[6]</sup> 2003<br>Germany  | GC = 24                      | H = 48         | GC > H            | Median = 10 (4 -46)                                      | 2 (0.2-8)                     | -                                                                                                     |
| <sup>[7]</sup> 2011<br>Turkey   | GC = 32                      | H = 40         | GC > H            | 29 $\pm$ 17                                              | 10 $\pm$ 7                    | Cachexia in GC is associated with changes in TNF- $\alpha$ .                                          |
| <sup>[8]</sup> 2006<br>Italy    | GC = 10                      | H = 15         | GC > H            | 205 $\pm$ 17                                             | 109 $\pm$ 9                   | The use of TNF- $\alpha$ in the screening and prognostic assessment of GC patients could be possible. |
| <sup>[9]</sup> 1994<br>Japan    | GC = 50                      | -              | -                 | Detected in 13 out of 50 patients                        | -                             | TNF is not constantly secreted even when TNF mRNA is expressed.                                       |
| <sup>[10]</sup> 1995<br>Oman    | GC = 21                      | H = 17         | GC < H            | 16.9                                                     | 52.34                         | Detectable in 6 out of 17 H<br>Detectable in 5 out of 21 GC                                           |
| <sup>[11]</sup> 1998<br>Taiwan  | GC = 220                     | H = 85         | -                 | Detected in 17 out of 220 patients                       | Not detected                  | TNF- $\alpha$ value was not an independent prognostic indicator.                                      |
| <sup>[12]</sup> 2009<br>Poland  | GC = 136                     | H = 42         | GC > H            | Detected in 52% of the patients                          | N/A                           | TNF level was significantly higher in stages I and IV of the disease.                                 |
| <sup>[13]</sup> 2000<br>Japan   | GC = 20                      | H = 10         | GC < H            | 107.2 $\pm$ 22.8 (45.9)                                  | 233.6 $\pm$ 48.2              | -                                                                                                     |
| <sup>[14]</sup> 1198<br>Japan   | GC = 12                      | H = 6          | -                 | -                                                        | -                             | TNF- $\alpha$ was undetectable in the serum of both cancer patients and controls.                     |
| <sup>[15]</sup> 2017<br>Mexico  | GC = 162                     | H = 201        | GC ~ H            | -                                                        | -                             | No differences in TNF- $\alpha$ levels were observed between GC and controls.                         |
| <sup>[16]</sup> 2018<br>China   | GC = 176<br>AH = 117         | H = 204        | GC ~ H            | AH = 6.7 (5.3, 8.3); GC = 10.2 (5.9, 16.4)               | 5.5 (4.2, 7.2)                | -                                                                                                     |
| <sup>[17]</sup> 2019<br>China   | GC = 142                     | H = 98         | GC > H            | 4 (3-6)                                                  | 3 (3-4)                       | -                                                                                                     |

WN, well-nourished; MN, malnourished; H, healthy; PL, precancerous lesions; LG, laparoscopy group; AOSG, Abdominal Open Surgery Group; AH, atypical hyperplasia; PCL, precancerous lesions

## REFERENCES

1. Correia M, Cravo M, Marques-Vidal P, Grimble R, Dias-Pereira A, Faias S, Nobre-Leitão C. Serum concentrations of TNF-alpha as a surrogate marker for malnutrition and worse quality of life in patients with gastric cancer. *Clinical nutrition* 2007; **26**(6): 728-735.
2. Bounder G, Jouimyi MR, Boura H, Touati E, Michel V, Badre W, Jouhadi H, Kadi M, Eljihad M, Benomar H, Kettani A, Lebrazi H, Maachi F. Associations of the -238(G/A) and -308(G/A) TNF- $\alpha$  promoter polymorphisms and TNF- $\alpha$  serum levels with the susceptibility to castric precancerous lesions and gastric cancer related to Helicobacter pylori infection in a Moroccan population. *Asian Pacific journal of cancer prevention* 2020; **21**(6): 1623-1629.
3. Aksoy EK, Akpınar MY, Doğan Ö, Göktaş Z, Sapmaz FP, Şimşek GG, Uzman M, Nazlıgül Y. Clinical significance of serum vascular endothelial growth factor, pigment epithelium-derived factor, tumor necrosis factor alpha, and progranulin levels in patients with gastric cancer and gastric precancerous lesions. *Journal of gastrointestinal cancer* 2019; **50**(3): 537-542.
4. Zhang L, Ren L, Shan K, Guo X, Wang J, Cui B, Cui B, An J. Serum inflammatory cytokines comparison in gastric cancer therapy. *Open medicine* 2019; **14**(1): 300-306.
5. Erturk K, Tastekin D, Serilmez M, Bilgin E, Bozbey HU, Vatansever S. Clinical significance of serum interleukin-29, interleukin-32, and tumor necrosis factor alpha levels in patients with gastric cancer. *Tumour biology* 2016; **37**(1): 405-412.
6. Konturek PC, Konturek SJ, Bielanski W, Kania J, Żuchowicz M, Hartwich A, Rehfeld JF, Hahn EG. Influence of COX-2 inhibition by rofecoxib on serum and tumor progastrin and gastrin levels and expression of PPARGgamma and apoptosis-related proteins in gastric cancer patients. *Digestive diseases and sciences* 2003; **48**(10): 2005-2017.
7. Kemik O, Kemik AS, Beğenik H, Erdur FM, Emre H, Sumer A, Purisa S, Tuzun S, Kotanlı C. The relationship among acute-phase response proteins, cytokines, and hormones in various gastrointestinal cancer types patients with cachectic. *Human and experimental toxicology* 2012; **31**(2): 117-125.
8. Macrì A, Versaci A, Loddo S, Scuderi G, Travagliante M, Trimarchi G, Teti D, Famulari C. Serum levels of interleukin 1beta, interleukin 8 and tumour necrosis factor alpha as markers of gastric cancer. *Biomarkers* 2006; **11**(2): 184-193.
9. Ohno M, Kato M, Nakamura T, Saitoh Y. Gene expression for tumor necrosis factor alpha and its production in gastric cancer patients. *Japanese journal of cancer research* 1994; **85**(10): 1029-1034.
10. Kabir S, Grant C, Daar AS. Serum levels of interleukin-1, interleukin-6 and tumour necrosis factor-alpha in patients with gastric carcinoma. *Cancer letters* 1995; **95**(1-2): 207-212.
11. Wu CW, Chi CW, Hsieh MC, Chao MF, Lui WY, P'Eng FK. Serum tumor necrosis factor in patients with gastric cancer. *Anticancer research* 1998; **18**: 1597-1599.
12. Szaflarska A, Szczepanik A, Siedlar M, Czupryna A, Sierzega M, Popiela T, Zembala M. Preoperative plasma level of IL-10 but not of proinflammatory cytokines is an independent prognostic factor in patients with gastric cancer. *Anticancer research* 2009; **29**(12): 5005-5012.
13. Shimamura H, Iwagaki H, Gouchi A, Morimoto Y, Ariki N, Funaki M, Tanaka N. Autologous serum deprivation restored IL-1 receptor antagonist production by peripheral blood mononuclear cells in patients with gastric cancer. *The journal of international medical research* 2000; **28**(6): 277-287.
14. Makino T, Noguchi Y, Yoshikawa T, Doi C, Nomura K. Circulating interleukin 6 concentrations and insulin resistance in patients with cancer. *The British journal of surgery* 1998; **85**(12): 1658-1662.
15. Sánchez-Zauco N, Torres J, Gómez A, Camorlinga-Ponce M, Muñoz-Pérez L, Herrera-Goepfert R, Medrano-Guzmán R, Giono-Cerezo S, Maldonado-Bernal C. Circulating blood levels of IL-6, IFN- $\gamma$ , and IL-10 as potential diagnostic biomarkers in gastric cancer: a controlled study. *BMC cancer* 2017; **17**(1): 384.
16. Li J, Xu L, Run ZC, Feng W, Liu W, Zhang PJ, Li Z. Multiple cytokine profiling in serum for early detection of gastric cancer. *World journal of gastroenterology* 2018; **24**(21): 2269-2278.
17. Sun X, Xiang C, Wu J, Dong W, Zhan Z, Wang R, Zhang JF. Relationship between serum inflammatory cytokines and lifestyle factors in gastric cancer. *Molecular and clinical oncology* 2019; **10**(3): 401-414.
